# Supplementary material
Source: PubMed Central journal article supplement (PMC10878628)
Supplement: NIHPP2023.10.19.563168v2-supplement-1.pdf [file NIHPP2023.10.19.563168v2-supplement-1.pdf]

849 **Supplementary Methods and Results**

850

851 **RNA-sequencing analysis of isolated dorsal striatal microglia.**

852 Biological replicates determined to be outliers were removed for differential gene expression analysis  
853 (**Supplementary Fig. 3A**). Principal component analysis (PCA) (**Supplementary Fig. 3B**) and heatmap of  
854 hierarchical clustering of conditions based on gene expression (**Supplementary Fig. 3C**) shows high  
855 similarity of samples within condition, and that animals exposed to methamphetamine (Maintenance and  
856 Abstinence) cluster more closely than to Saline.

857

858 **Microglia are not required for natural food reinforcement.**

859 To test if microglia are necessary for learned operant behavior, we food-trained mice up to FR5 for 8  
860 consecutive days (**Supplementary Fig. 5**). Mice were treated with PLX5622 (1200 ppm in AIN-76A chow)  
861 for the duration of the experiment. Microglial ablation does not affect natural food reinforcement in number  
862 of rewards earned (**Supplementary Fig. 5A**) (Two-way RM ANOVA; AIN-76A vs PLX5622,  $F(1, 13) = .073$ ,  
863  $p = .791$ ) or lever discrimination (**Supplementary Fig. 5B**) (Two-way RM ANOVA; Active vs Inactive Lever,  
864  $F(3, 26) = 24.38$ ,  $p < .0001$ ) and time to acquire operant lever pressing behavior (**Supplementary Fig. 5B**)  
865 (Two-way RM ANOVA; AIN-76A vs PLX5622,  $F(1, 13) = .385$ ,  $p = .545$ ).

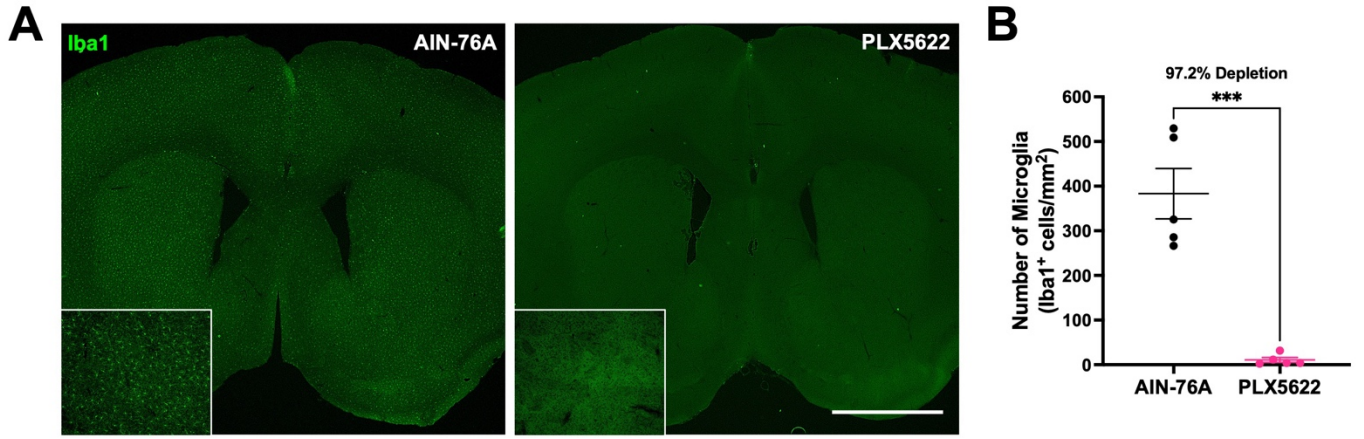

866  
867  
868  
869  
870  
871  
872

**Supplementary Figure 1. Treatment with CSF1R inhibitor PLX5622 results in near complete depletion of microglia. A)** Representative fluorescent images of Iba1<sup>+</sup> microglia (green) in the dorsal striatum from AIN-76A and PLX5622-treated mice. **B)** Quantification of microglial density. Unpaired t-test (AIN-76A vs PLX5622, \*\*\* $p < .001$ ).  $n = 5$  per group. Data are represented as mean  $\pm$  SEM. Scale bar = 1360  $\mu$ m.

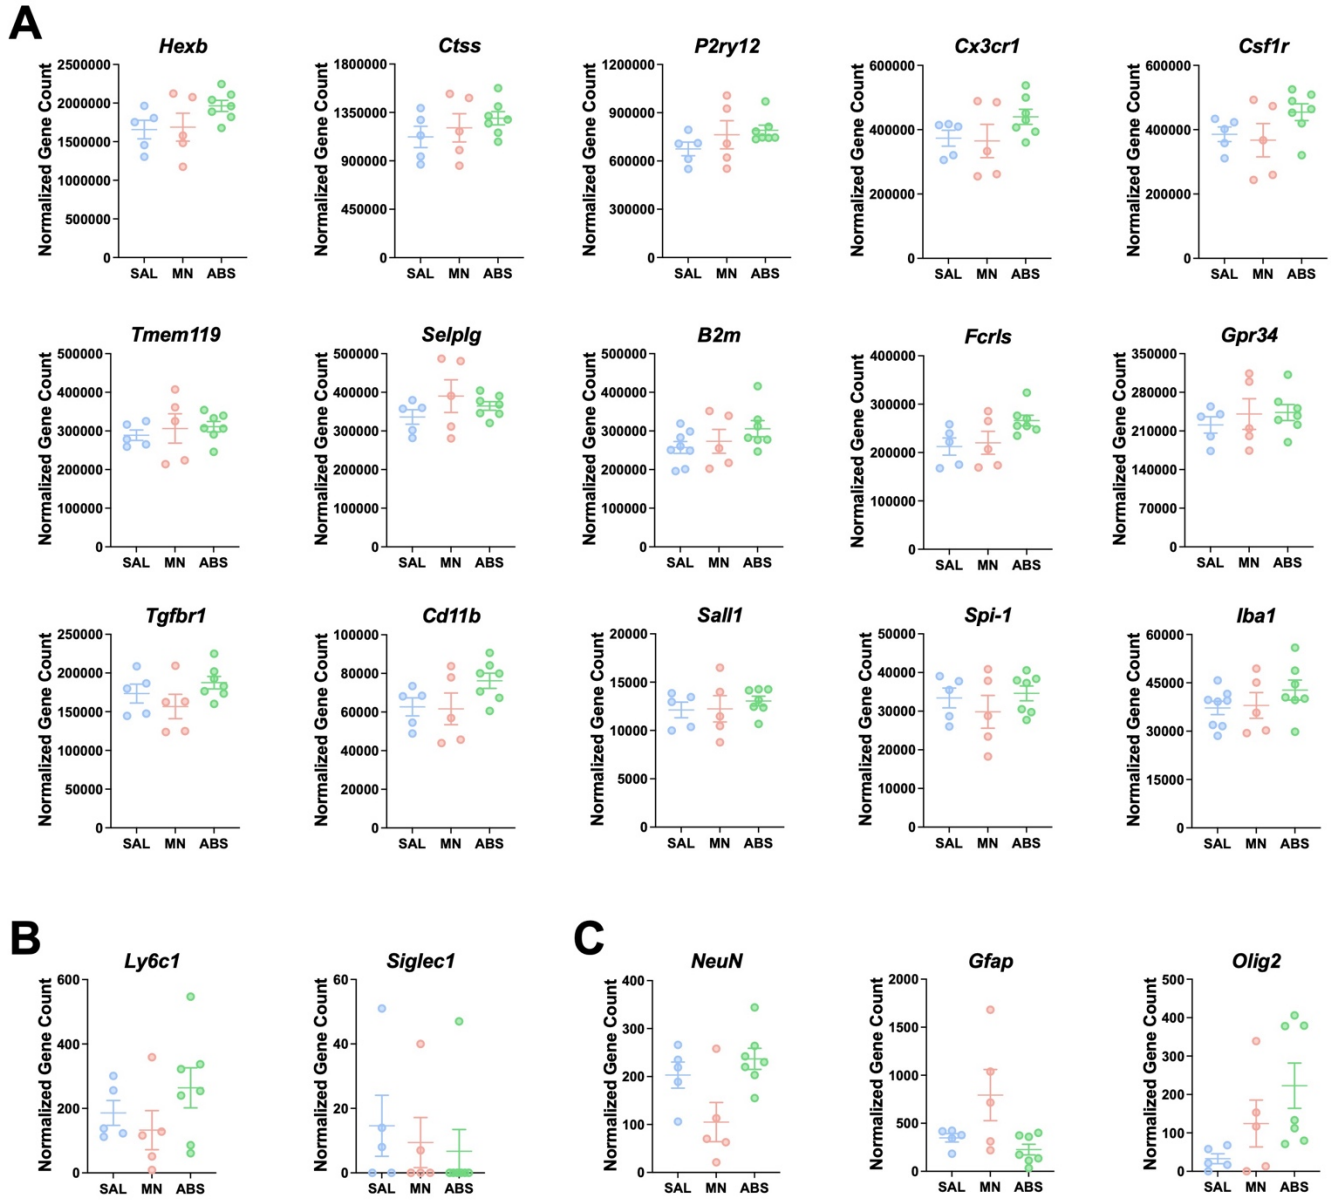

873  
874

875

876

877

**Supplementary Figure 2. Purity of isolated dorsal striatal microglia. A)** Normalized counts of microglia-specific genes. **B)** Normalized counts of macrophage-specific genes. **C)** Normalized counts of other neural cell types-specific genes: neurons (*NeuN*), astrocytes (*Gfap*), oligodendrocytes (*Olig2*).

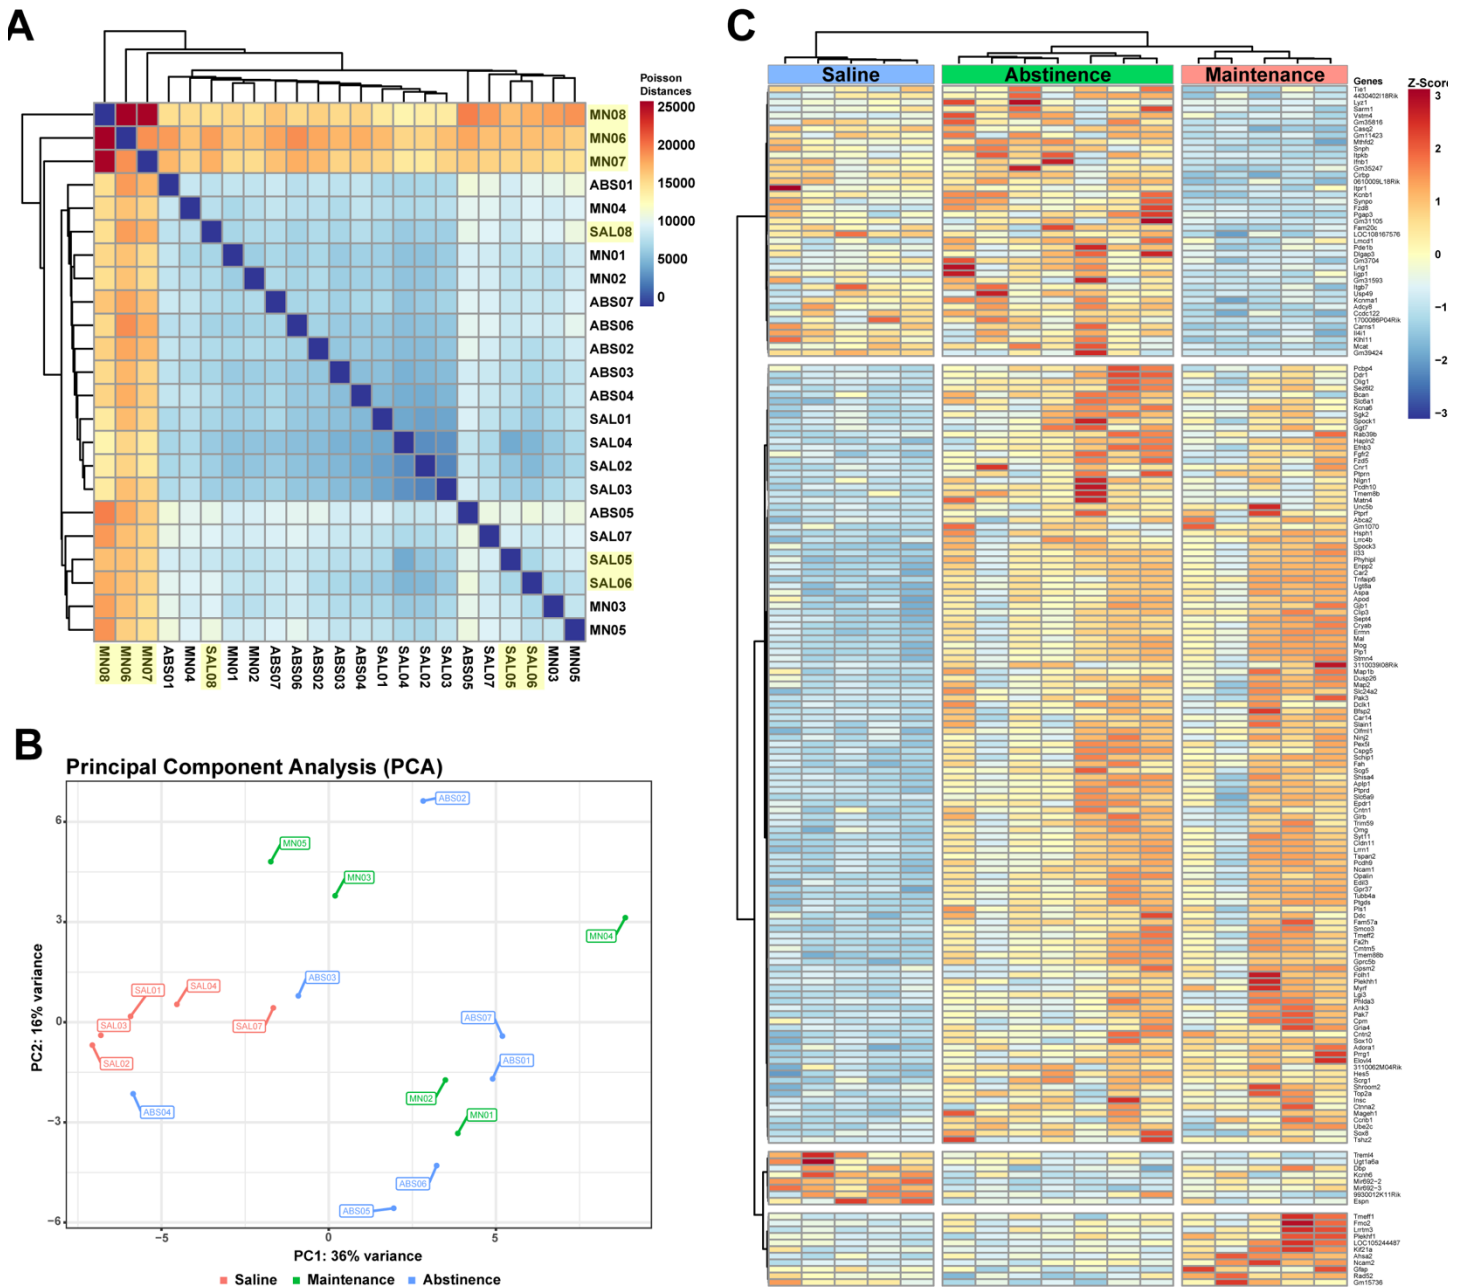

878  
879

880 **Supplementary Figure 3. RNA-sequencing of isolated dorsal striatal microglia from METH IVSA. A)**  
 881 Hierarchical clustering heatmap of expression profiles for samples (n = 23) based on Poisson distance.  
 882 Highlighted samples were determined to be outliers and were removed from analyses. **B)** PCA plot for  
 883 samples (n = 17) following removal of outliers. **C)** Heatmap showing unsupervised clustering of samples  
 884 based on gene expression.  
 885

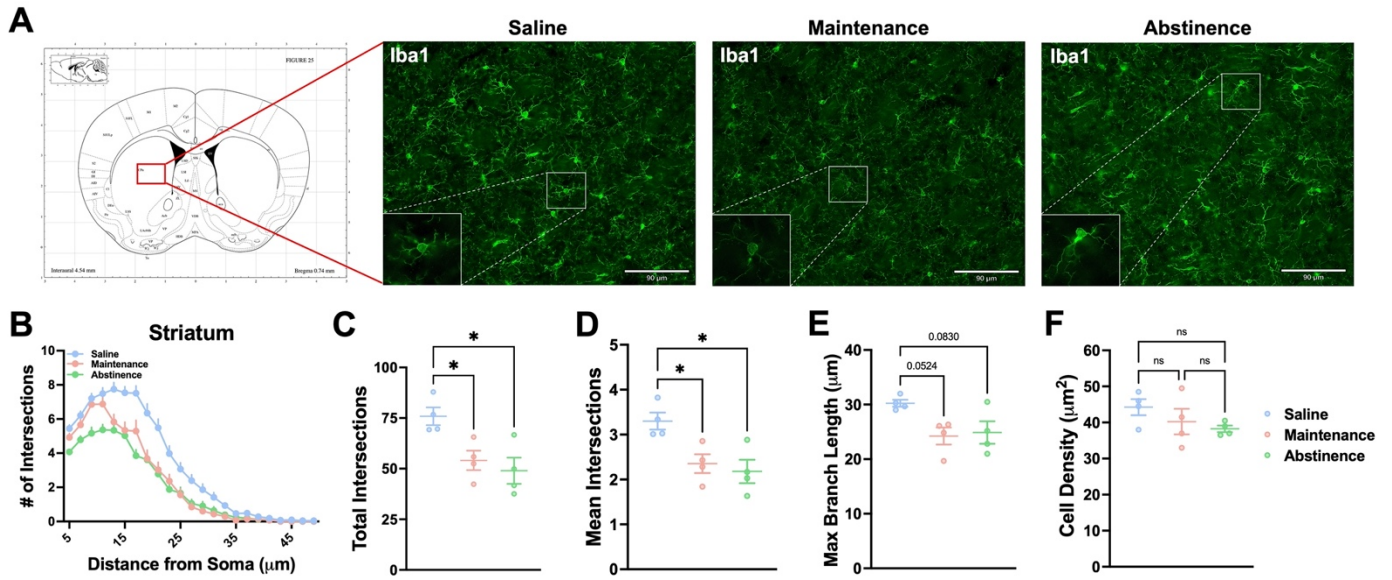

886

887

888

889

890

891

892

893

**Supplementary Figure 4. Dorsal striatal microglia show persistent altered morphology due to METH administration.** **A)** Representative fluorescent images (Bregma 0.74 mm, Paxinos and Franklin's the Mouse Brain in Stereotaxic Coordinates) of microglia (Iba1<sup>+</sup> cells) in the striatum. **B)** Sholl analysis plot of microglia. **C-F)** Mice that self-administered METH (Maintenance), as well as METH-abstinent mice (Abstinence), display less ramifications and branching complexity and shorter processes than Saline-taking mice (Saline), with no significant change in density. One-way ANOVA with Tukey post-hoc test (between conditions, \* $p < .05$ ).  $n = 4$  animals for all conditions. Data are represented as mean  $\pm$  SEM. Scale bar = 90  $\mu\text{m}$ .



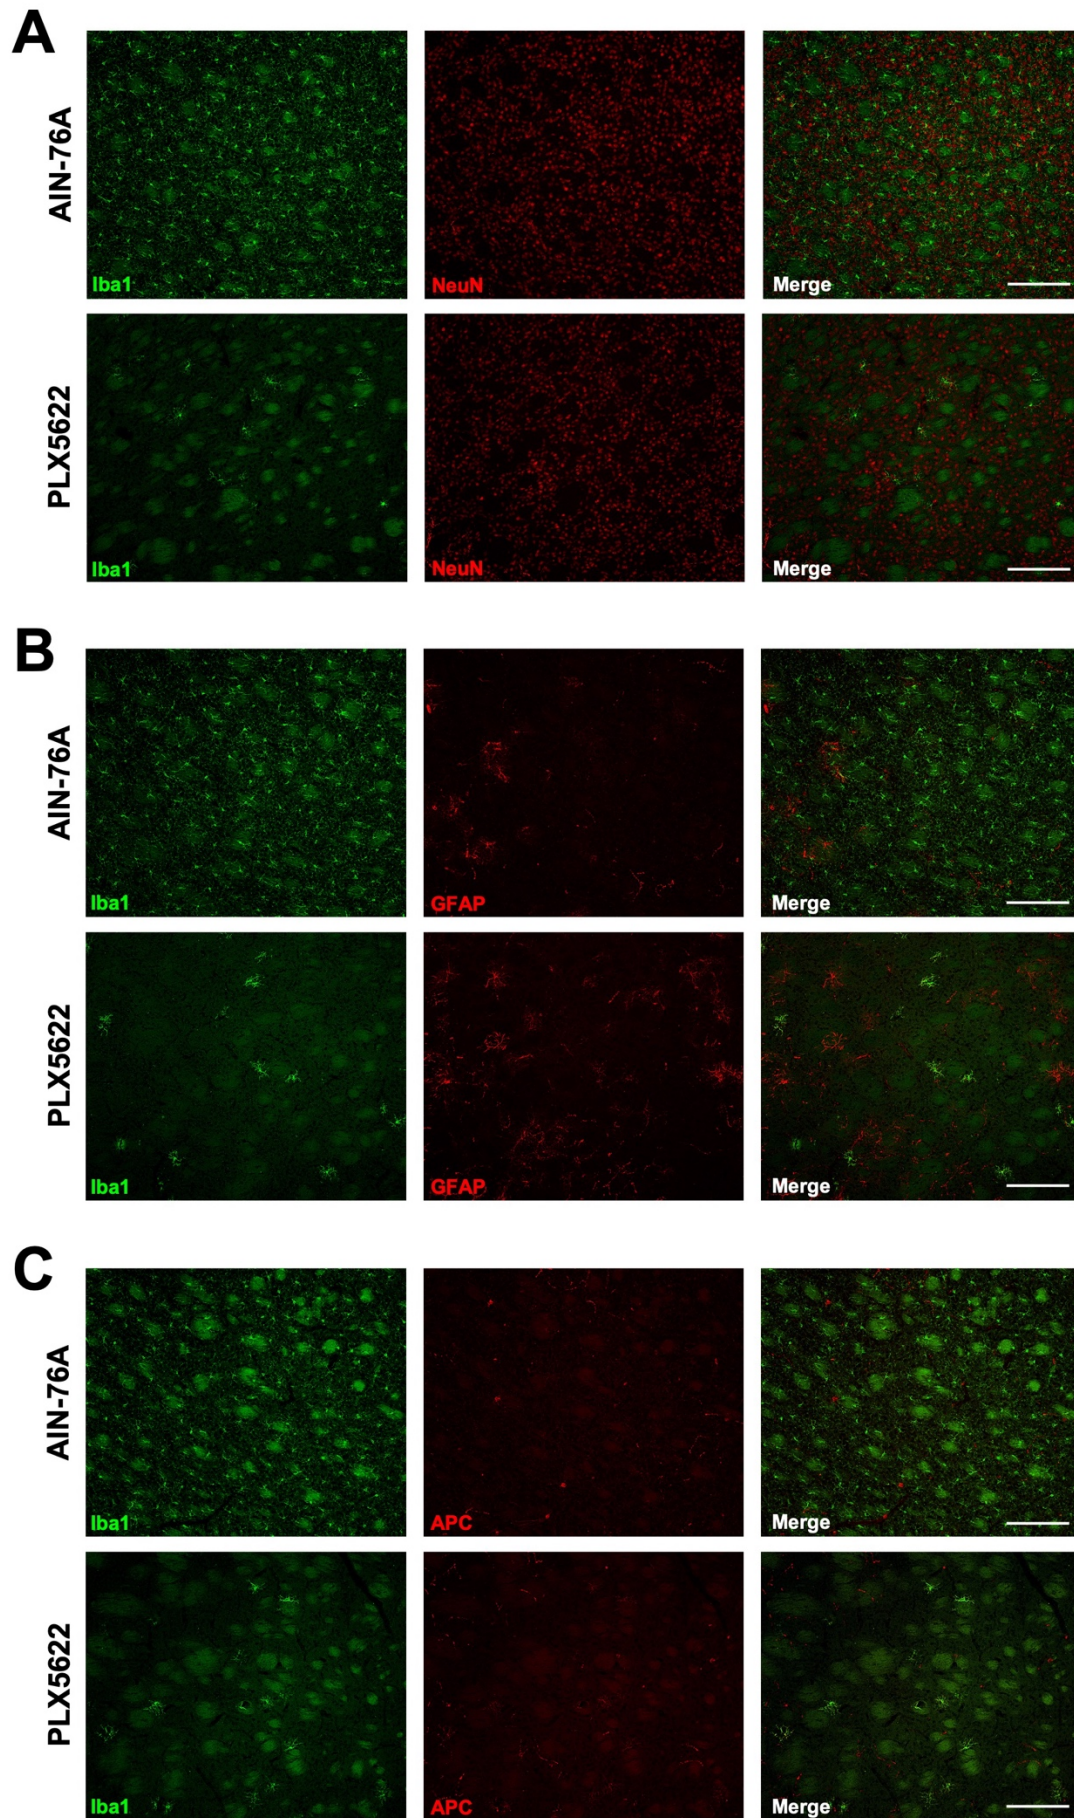

896 **Supplementary Figure 5. PLX5622 treatment does not affect general morphology of neural cells in**  
897 **the dorsal striatum. A)** Representative 10X images of microglia (Iba1<sup>+</sup>, green) and neurons (NeuN<sup>+</sup>, red).  
898 **B)** Representative 10x images of microglia (Iba1<sup>+</sup>, green) and astrocytes (GFAP<sup>+</sup>, red). **C)** Representative  
899 10X images of microglia (Iba1<sup>+</sup>, green) and oligodendrocytes (APC<sup>+</sup>, red). Scale bar = 170 μm.  
900

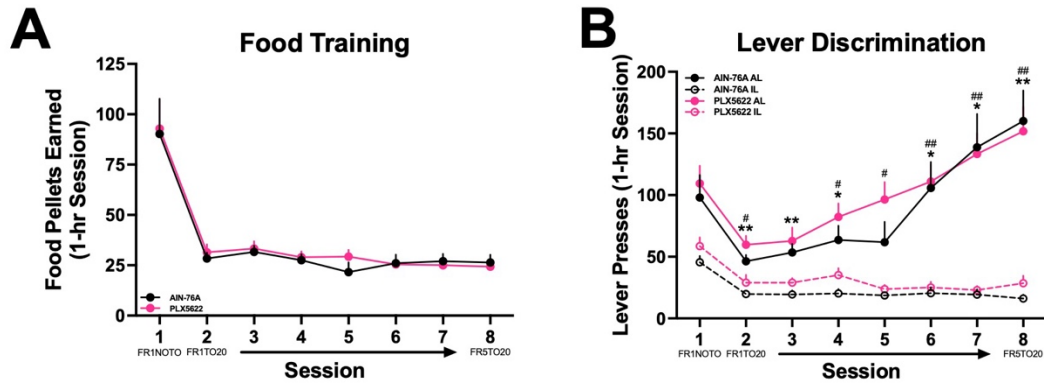

901

902 **Supplementary Figure 6. Pharmacological ablation of microglia does not affect operant responding.**

903 **A)** Number of food rewards earned during 8 daily 1-hr sessions. **(B)** Active vs inactive lever presses during

904 8 daily 1-hr sessions (Two-way RM ANOVA with Bonferroni post-hoc test; AIN-76A Active vs Inactive Lever,

905 \* $p < .05$ , \*\* $p < .01$ ; PLX5622 Active vs Inactive Lever, #  $p < .05$ , ##  $p < .01$ ). AIN-76A ( $n = 8$ ), PLX5622 ( $n = 7$ ).

906 Data are represented as mean  $\pm$  SEM.

907



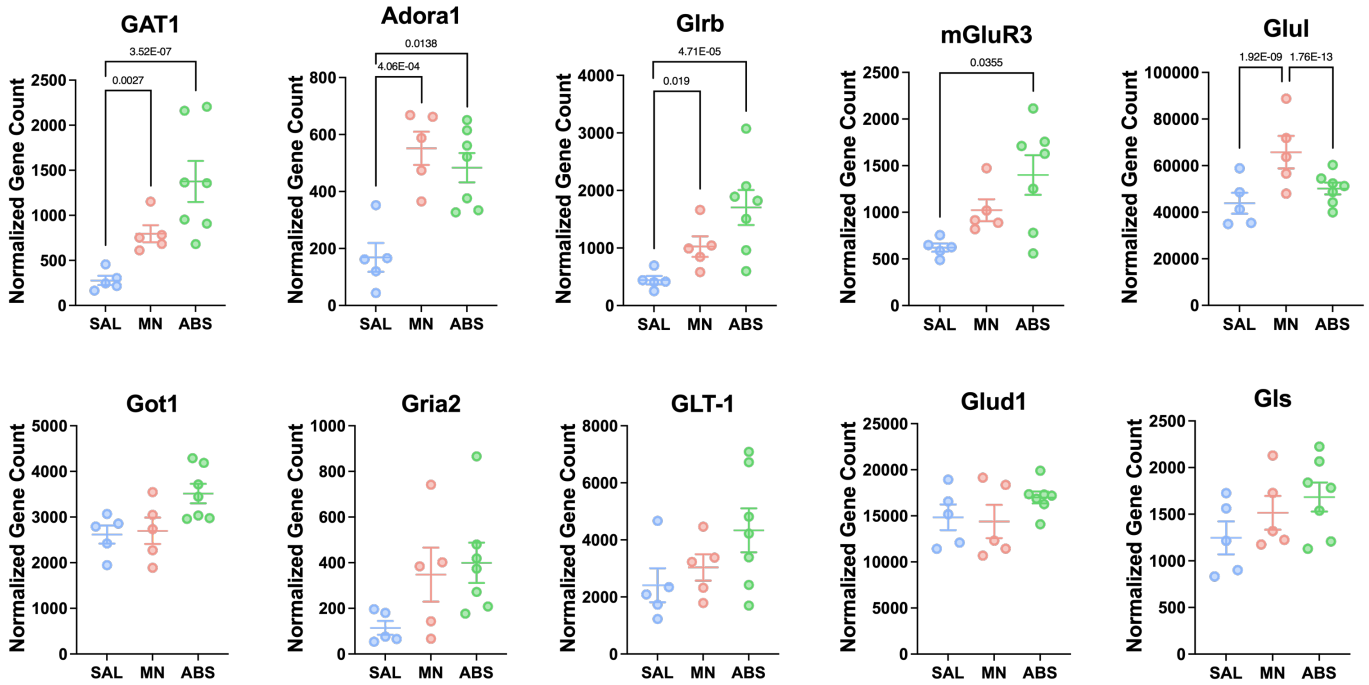

908

909

**Supplementary Figure 7. GABA, glutamate, and adenosine signaling-related genes.** Normalized counts

910

of DE genes related to GABA, glutamate, and adenosine signaling with adjusted *p-value* for each

911

comparison. Significance shown reflects pairwise comparison results from DESeq2.

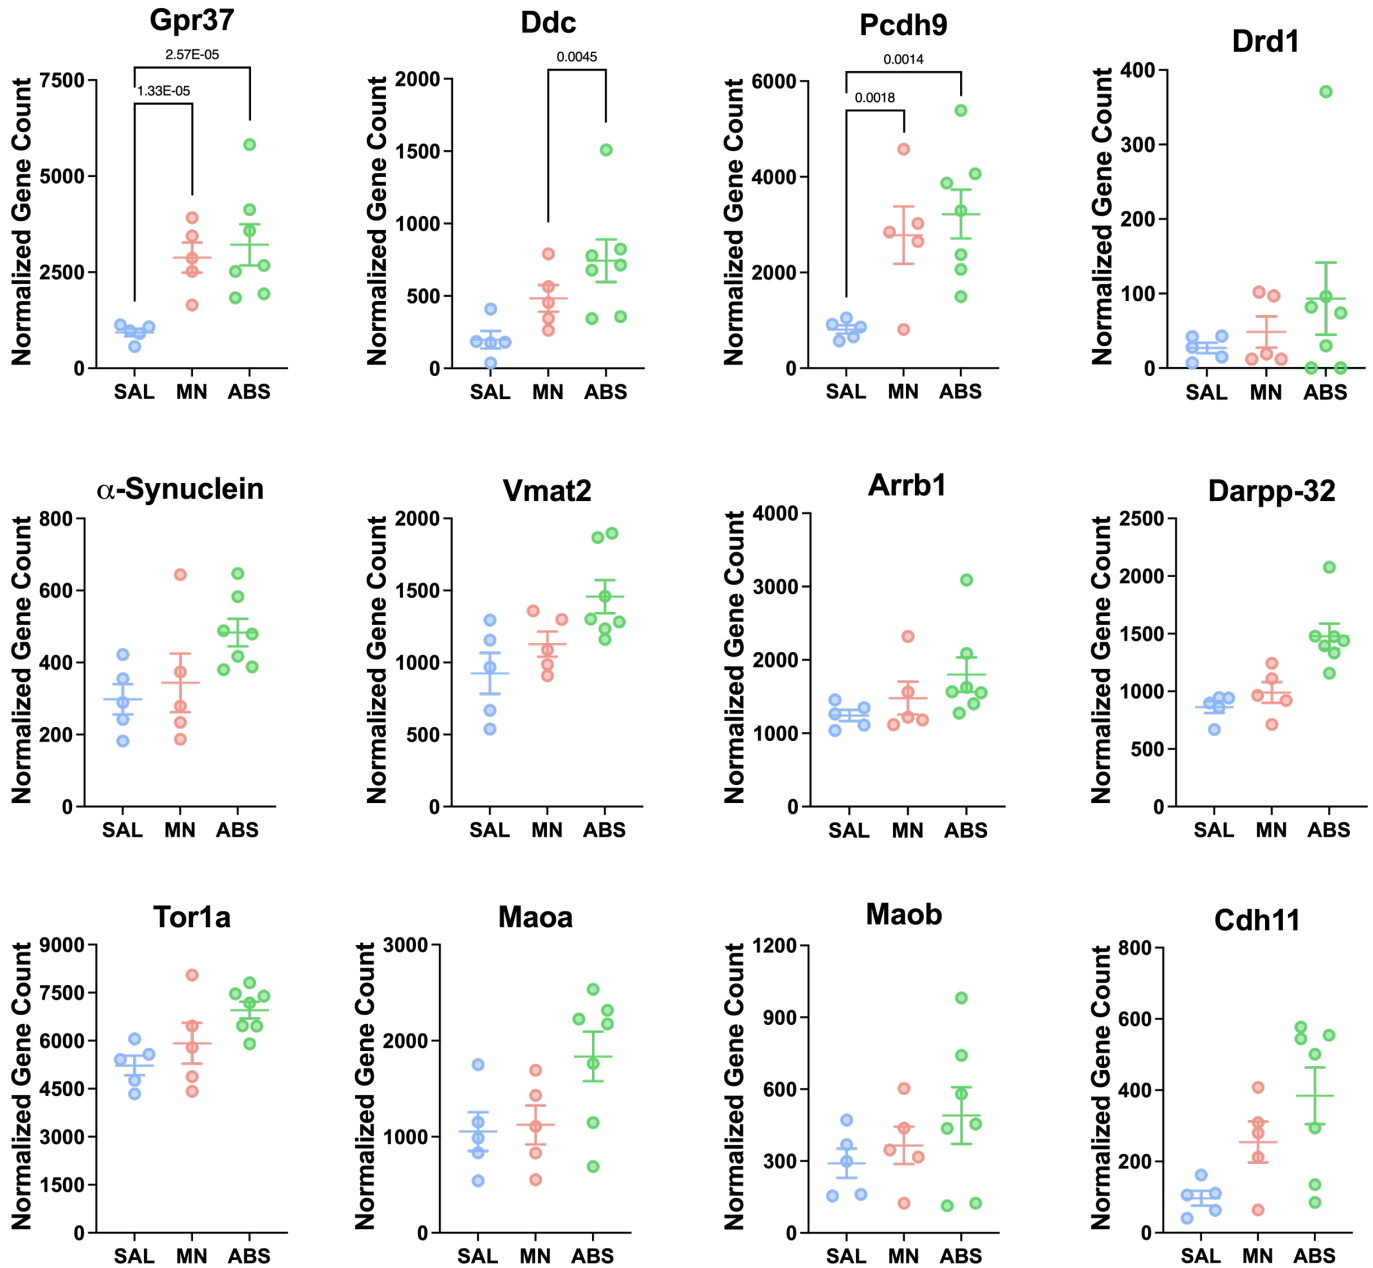

912

913

**Supplementary Figure 8. Dopamine signaling-related genes.** Normalized counts of DE genes with adjusted *p*-value for each comparison. Significance shown reflects pairwise comparison results from DESeq2.

914

915

916

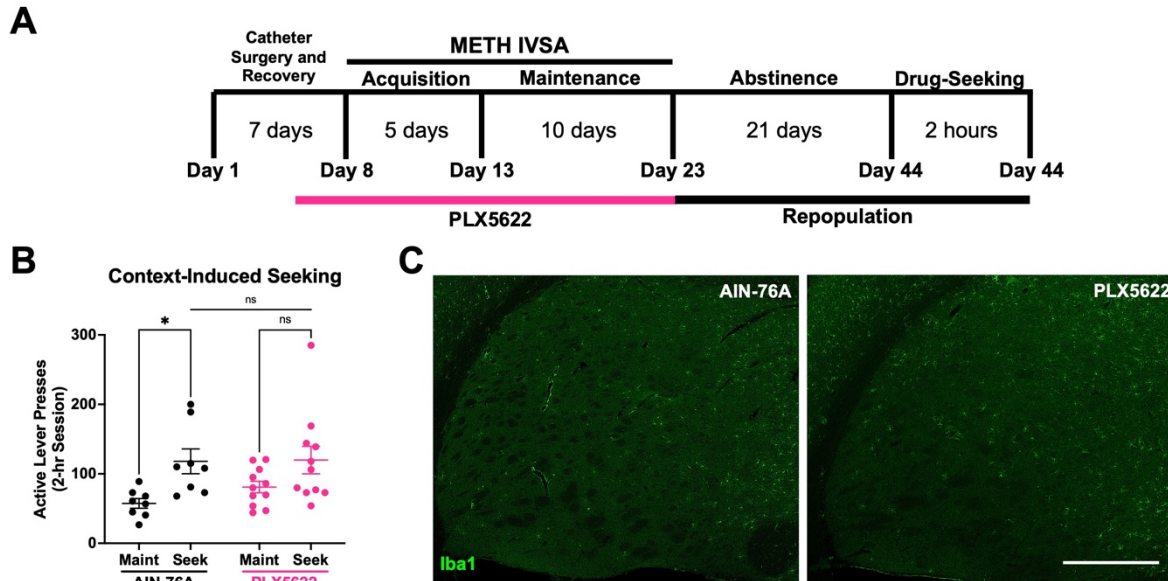

917

918 **Supplementary Figure 9. Repopulation of microglia prevents context-induced drug-seeking.** Mice  
919 were treated with PLX5622 for the duration of METH IVSA before being returned to control chow (AIN-76A)  
920 for the duration of abstinence. **A)** Experimental timeline. **B)** Active lever presses for Maintenance (**Maint**:  
921 average final 3 days) and Drug-Seeking (**Seek**) of AIN-76A and PLX5622. Two-way RM ANOVA with  
922 Bonferroni post-hoc test (AIN-76A Maint vs Seek, \*  $p < .05$ ; PLX5622 Maint vs Seek,  $p = .144$ ; AIN-76A vs  
923 PLX5622 Seek,  $p = .392$ ). **C)** Representative fluorescent images of Iba1<sup>+</sup> microglia (green) in the dorsal  
924 striatum from AIN-76A and PLX5622 treated mice. AIN-76A (n = 8), PLX5622 (n = 11). Data are represented  
925 as mean  $\pm$  SEM. Scale bar = 470  $\mu$ m.
